# Supplementary material for: Five-Year Follow-Up of Clinical Outcomes with an Anatomic Dual-Mobility Acetabular System: A Multicenter Study
Source: PubMed Central journal article supplement — Arthroplast Today. 2020 Jul 27;6(3):543–7. doi: 10.1016/j.artd.2020.06.013 (PMC7393448; doi:10.1016/j.artd.2020.06.013), 2020-07-27
Supplement: mmc7.pdf [file mmc7.pdf]

# INDIVIDUAL CONFLICT OF INTEREST STATEMENT

## *American Association of Hip and Knee Surgeons*

(Adopted from the American Academy of Orthopaedic Surgeons disclosure statement)

The following form **must be filled out completely and submitted by each author (example, 6 authors, 6 forms).**  
**All items require a response. If there is no relevant disclosure for a given item, enter "None."**

---

**Manuscript Title**

- 1. Royalties from a company or supplier (The following conflicts were disclosed)  
None
- 2. Speakers bureau/paid presentations for a company or supplier (The following conflicts were disclosed)  
None
- 3A. Paid employee for a company or supplier (The following conflicts were disclosed)  
None
- 3B. Paid consultant for a company or supplier (The following conflicts were disclosed)  
None
- 3C. Unpaid consultants for a company or supplier (The following conflicts were disclosed)  
None
- 4. Stock or stock options in a company or supplier (The following conflicts were disclosed)  
None
- 5. Research support from a company or supplier as a Principal Investigator (The following conflicts were disclosed)  
None
- 6. Other financial or material support from a company or supplier (The following conflicts were disclosed)  
None
- 7. Royalties, financial or material support from publishers (The following conflicts were disclosed)  
None
- 8. Medical/Orthopaedic publications editorial/governing board (The following conflicts were disclosed)  
None
- 9. Board member/committee appointments for a society (The following conflicts were disclosed)  
None

**Each author must sign AND print or type his/her name, date and submit a separate form**

In addition, one BLINDED Conflict of Interest form (no author names used) should be submitted per manuscript with all author disclosures.

---

|                             |                  |           |  |
|-----------------------------|------------------|-----------|--|
| Ahava Muskat                | Ahava Muskat     | 6/11/2019 |  |
| Author Name (Print or Type) | Author Signature | Date      |  |
